# Supplementary material for: Bovine F1Fo ATP synthase monomers bend the lipid bilayer in 2D membrane crystals
Source: eLife journal article supplement (doi:10.7554/elife.06119), 2015-03-27
Supplement: figures [file elife-06119-figures-v2.pdf]

---

## Figures and figure supplements

Bovine  $F_1F_o$  ATP synthase monomers bend the lipid bilayer in 2D membrane crystals

**Chimari Jiko, et al.**

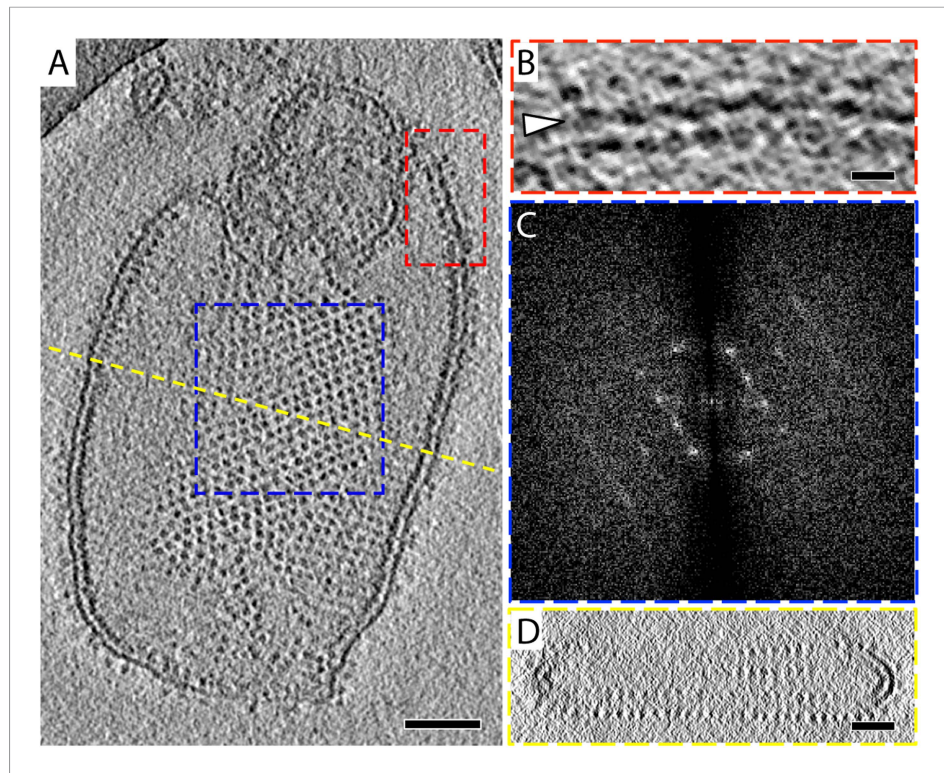

**Figure 1.** 2D crystals of  $F_1F_0$  ATP synthase in vitreous ice. **(A)** Tomographic slice of a vesicle reconstituted with  $F_1F_0$  ATP synthase. The ATP synthases appear as 10 nm spherical densities located 15 nm above the membrane. **(B)** Enlarged view of red boxed area in **(A)** showing the zigzag membrane structure (arrowhead). (See also **Figure 2**.) **(C)** Fourier transform of the blue-boxed area in **(A)**. **(D)** Cross-section along the yellow dashed line in **(A)**. Scale bar: **(A)** 100 nm, **(B)** 20 nm, **(D)** 50 nm.

DOI: [10.7554/eLife.06119.003](https://doi.org/10.7554/eLife.06119.003)

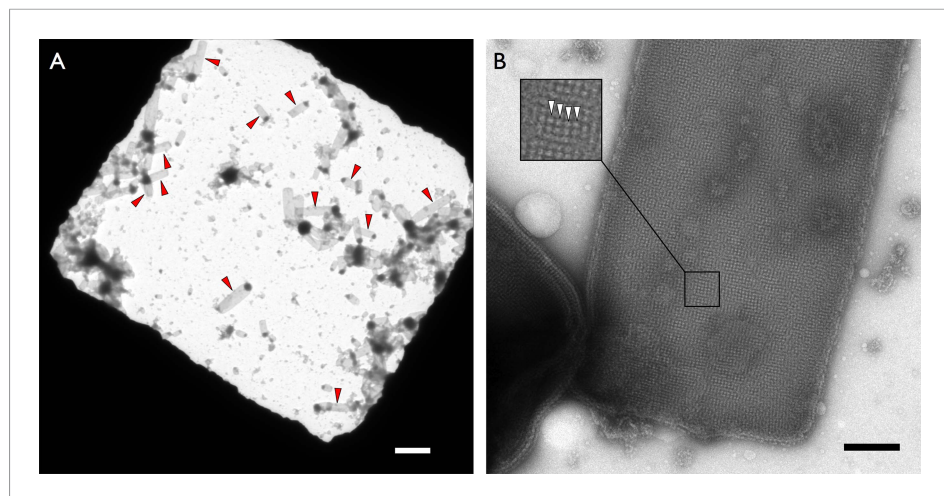

**Figure 1—figure supplement 1.** Crystalline vesicles of  $F_1F_0$  ATP synthase in negative stain. **(A)** Overview of an EM grid square with numerous rectangular crystalline vesicles (red arrowheads). Scale bar 3  $\mu\text{m}$ . **(B)** Rectangular crystalline vesicle at higher magnification with boxed area enlarged.  $F_1$  heads (white arrowheads). Scale bar 200 nm.

DOI: [10.7554/eLife.06119.004](https://doi.org/10.7554/eLife.06119.004)

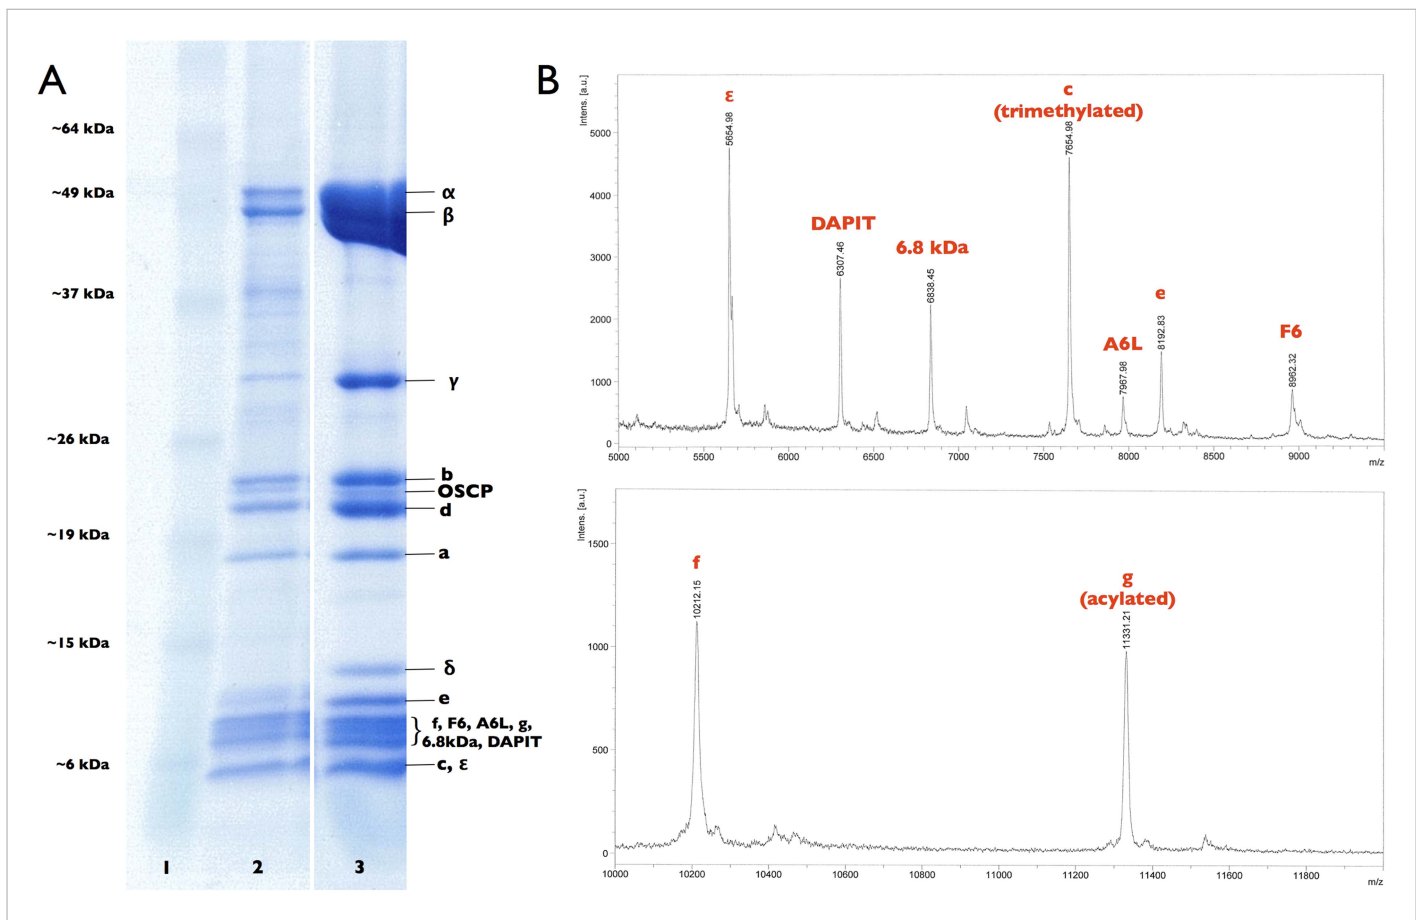

**Figure 1—figure supplement 2.** Subunit composition of  $F_1F_o$  ATP synthase isolated from 2D crystals. **(A)** SDS-polyacrylamide gradient gel (10–20%) showing the subunit composition of purified  $F_1F_o$  ATP synthases before (lane 2) and after (lane 3) 2D crystallisation. Lane 1, molecular marker (BenchMark). **(B)** Mass spectrometry profile of small subunits (5000–12,000 Da) of the  $F_1F_o$  ATP synthase isolated from 2D crystals. All  $F_1F_o$  ATP synthase subunits are present in the 2D crystals.

DOI: [10.7554/eLife.06119.005](https://doi.org/10.7554/eLife.06119.005)

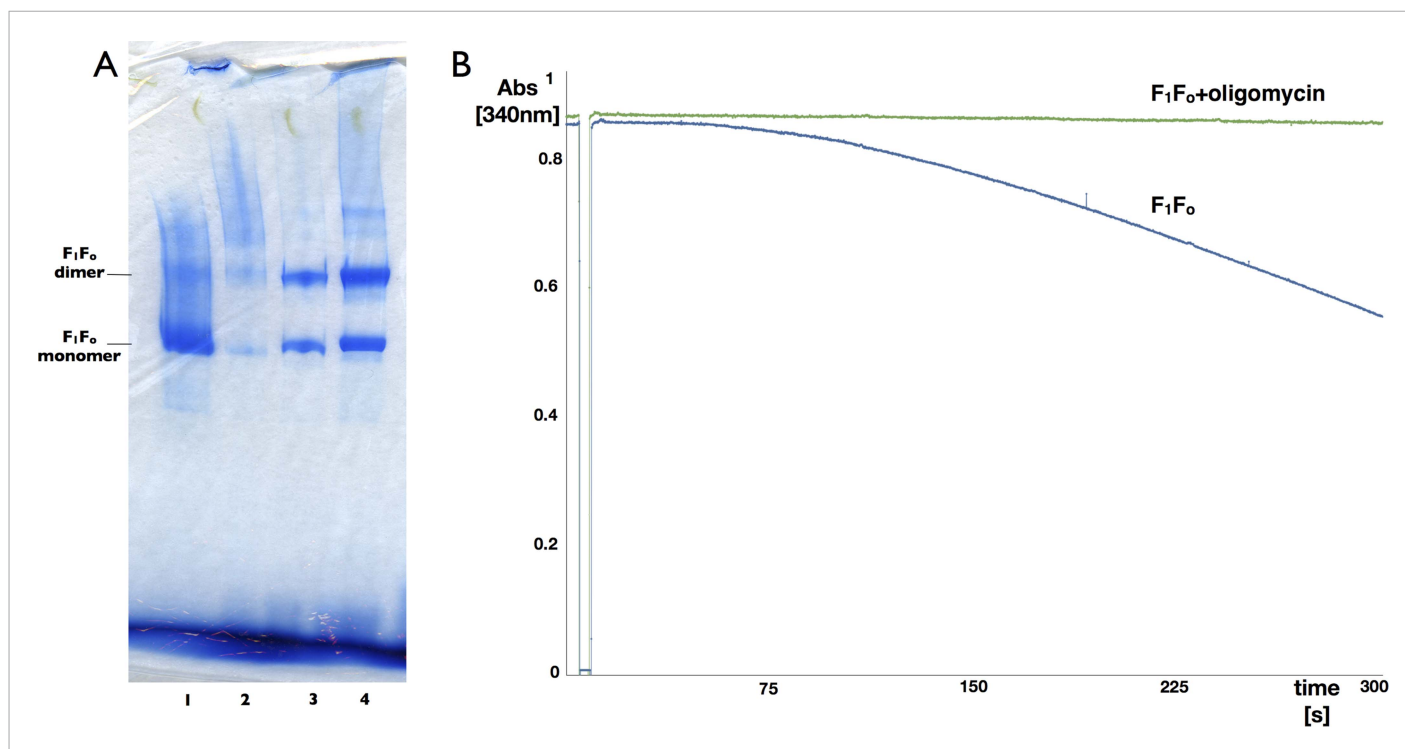

**Figure 1—figure supplement 3.** Blue-native polyacrylamide gel and activity assay of  $F_1F_0$  ATP synthase isolated from 2D crystals. **(A)** BN polyacrylamide gradient gel (4–12%) of purified  $F_1F_0$  ATP synthase solubilized in decylmaltoside (lane 1 and 2, 15  $\mu$ g and 2  $\mu$ g respectively) and of digitonin-resolubilised 2D crystals (lane 3 and 4, 30  $\mu$ g and 90  $\mu$ g respectively). Bands of lower molecular weight subcomplexes, that is,  $F_0$  or  $c_8$ , are weak or absent. The dimer band in lane 1 and 2 presumably stems from mitochondrial  $F_1F_0$  ATP synthase dimers preserved by mild purification conditions. The dimer band visible in lane 3 and 4 most likely represents non-physiological  $F_1F_0$  ATP synthase dimers that form in the 2D crystals. **(B)** Typical ATPase activity and oligomycin-sensitivity of digitonin-resolubilised  $F_1F_0$  ATP synthase isolated from 2D crystals. The hydrolysis of ATP by the  $F_1F_0$  ATP synthase was monitored using an enzyme couple assay by detecting NADH oxidation at 340 nm at 20°C in the absence (blue) or presence (green) of oligomycin. Oligomycin inhibits ATP hydrolysis through  $F_1$  by stopping rotation of the  $F_0$  motor, that is, oligomycin sensitivity gives a measure of the amount of coupled, intact  $F_1F_0$  ATP synthase complexes in the preparation, in this case >95%.

DOI: [10.7554/eLife.06119.006](https://doi.org/10.7554/eLife.06119.006)



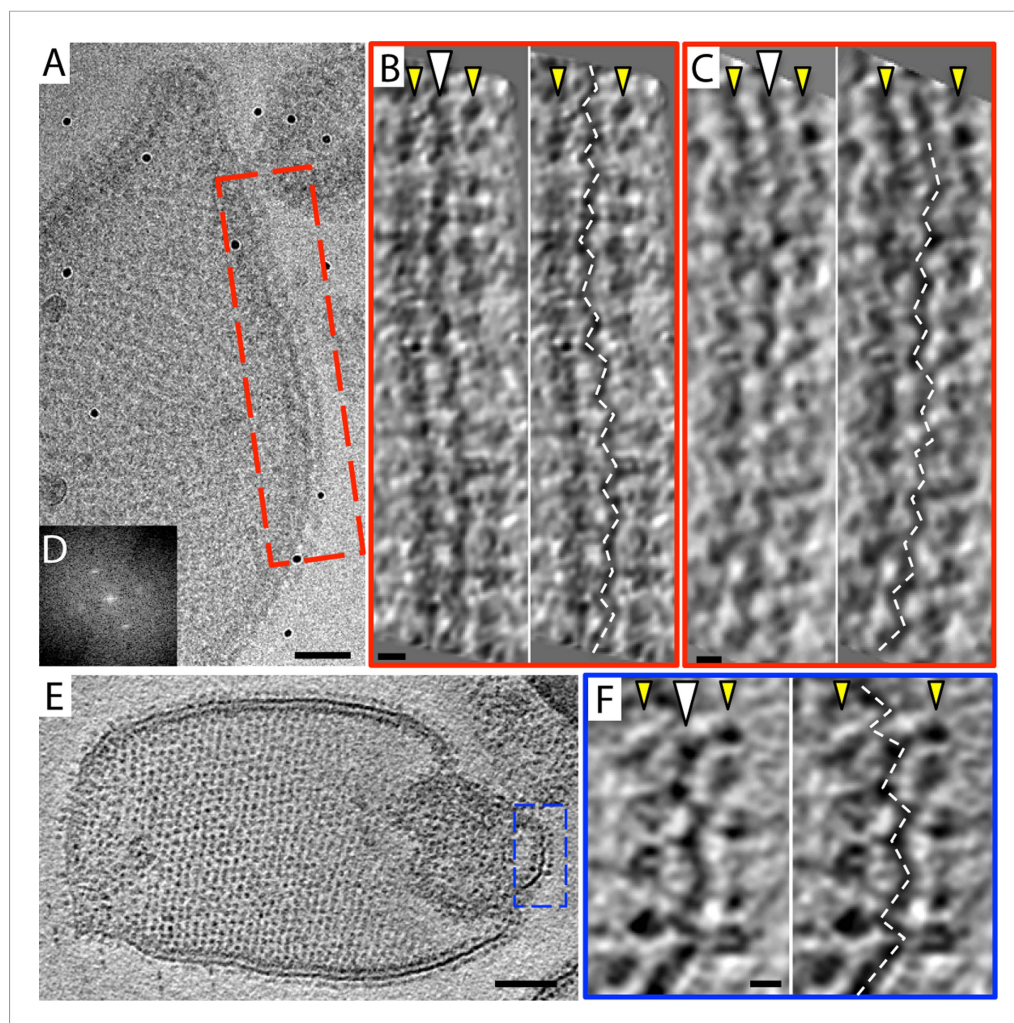

**Figure 2.** Zigzag membrane structure. (A) Projection image of a vesicle reconstituted with  $F_1F_o$  ATP synthase. (B) and (C) tomographic slices of boxed area in (A) at different z-heights. (D) Fourier transform of an oblique tomographic slice through boxed area in (A) showing weak diffraction. (E) Tomographic slice of rectangular crystalline vesicle. (F) Close-up of boxed area in (E). White arrowhead, indicates membrane plane, yellow arrowhead, line of  $F_1$  head groups. Scale bar: (A) 50 nm, (B, C, and F) 10 nm, (E) 100 nm.

DOI: [10.7554/eLife.06119.007](https://doi.org/10.7554/eLife.06119.007)

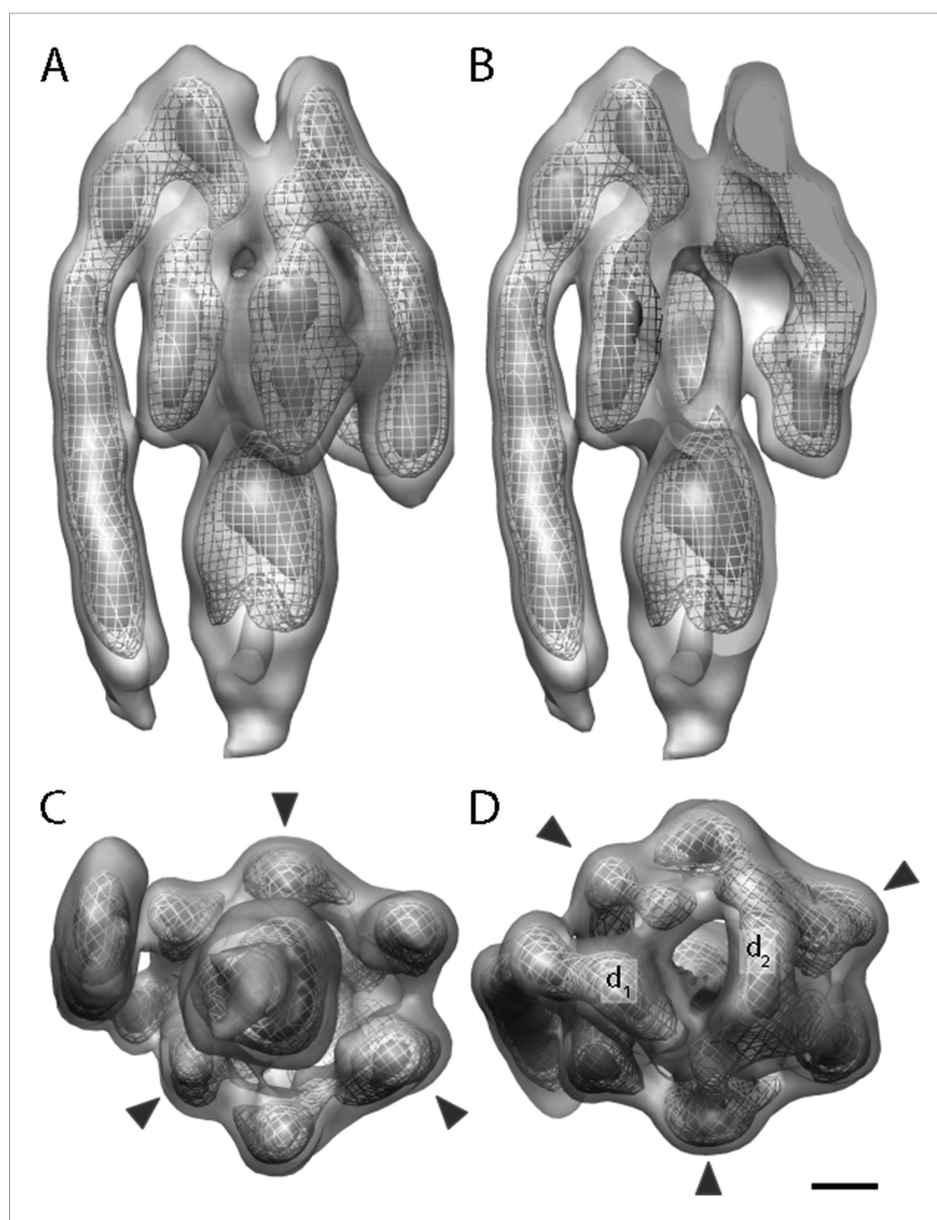

**Figure 3.** Sub-tomogram average of bovine heart mitochondrial  $F_1F_0$  ATP synthase calculated from 2D crystals. (A) Surface view, (B) longitudinal section showing central stalk, (C) bottom view and (D) top view. Arrowheads: positions of the  $\beta$  subunits.  $d_1$  and  $d_2$ : densities connecting peripheral stalk to  $F_1$  subcomplex. Threshold levels: light grey, 1  $\sigma$ ; mesh, 3  $\sigma$ ; dark grey, 5  $\sigma$ . Scale bar: 20 Å.

DOI: [10.7554/eLife.06119.008](https://doi.org/10.7554/eLife.06119.008)

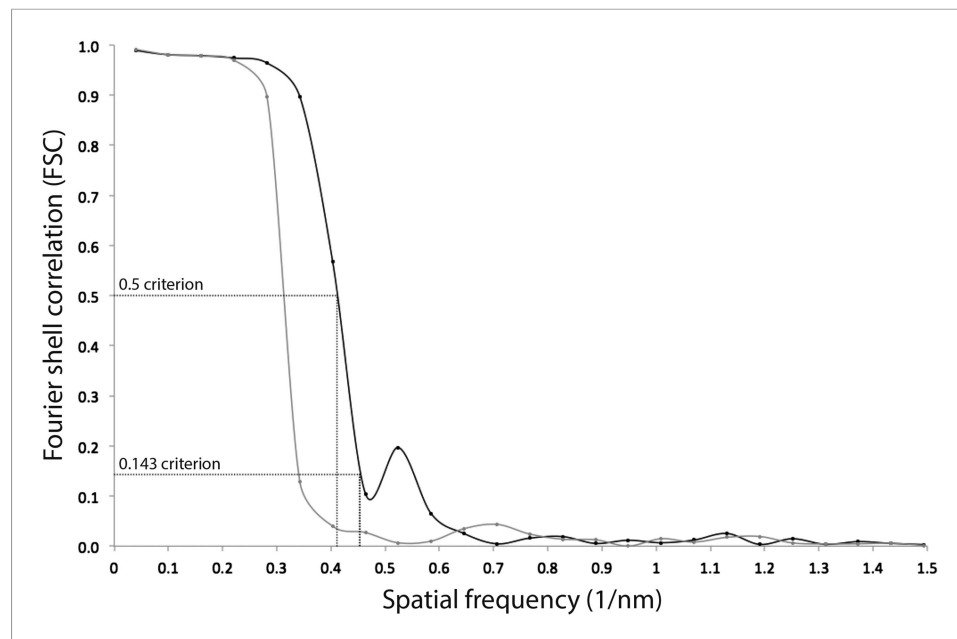

**Figure 3—figure supplement 1.** Resolution estimate of the ATP synthase monomer sub-tomogram average. Fourier shell correlation (FSC) curves were calculated by comparing averages generated from two independently processed data sets ('Gold standard'; *Scheres and Chen, 2012*, black line). To check for overfitting, phases beyond 40 Å were randomized (*Chen et al., 2013*) and the final alignment iteration repeated (grey line). According to the FSC 0.5 criterion (crosshairs), the ATP synthase monomer average has a resolution of 2.4 nm. Points on the FSC curves mark spatial frequency shells used in the FSC calculation.

DOI: [10.7554/eLife.06119.009](https://doi.org/10.7554/eLife.06119.009)

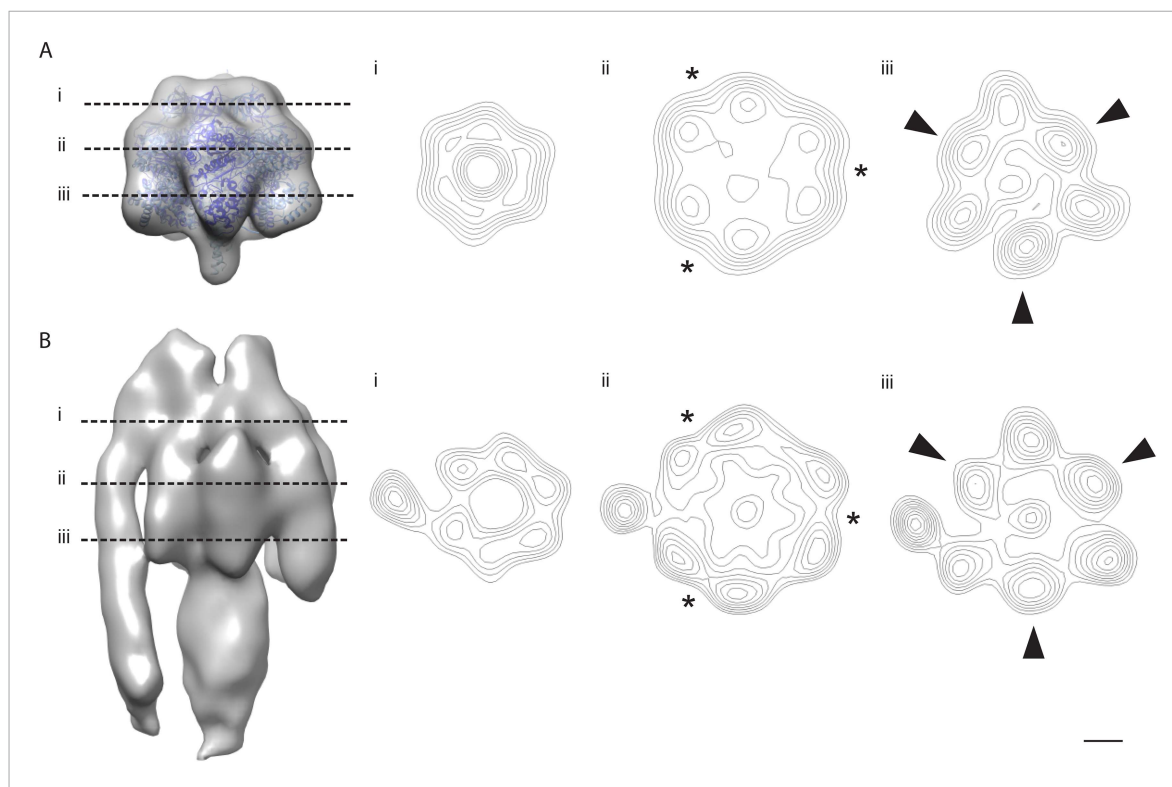

**Figure 3—figure supplement 2.** The  $\alpha/\beta$  hexamer. **(A)** X-ray map of catalytic domain (PDB code: 1BMF, **Abrahams et al., 1994**) Fourier-filtered to 25 Å. **(B)** Subtomogram average calculated from 2D crystals. Dashed lines, cross-section levels in i–iii. Arrowheads, beta subunits \*, catalytic interface between  $\alpha$  and  $\beta$  subunits. Contour levels drawn at intervals of 0.5 sigma above mean. Scale bar, 20 Å.

DOI: [10.7554/eLife.06119.010](https://doi.org/10.7554/eLife.06119.010)



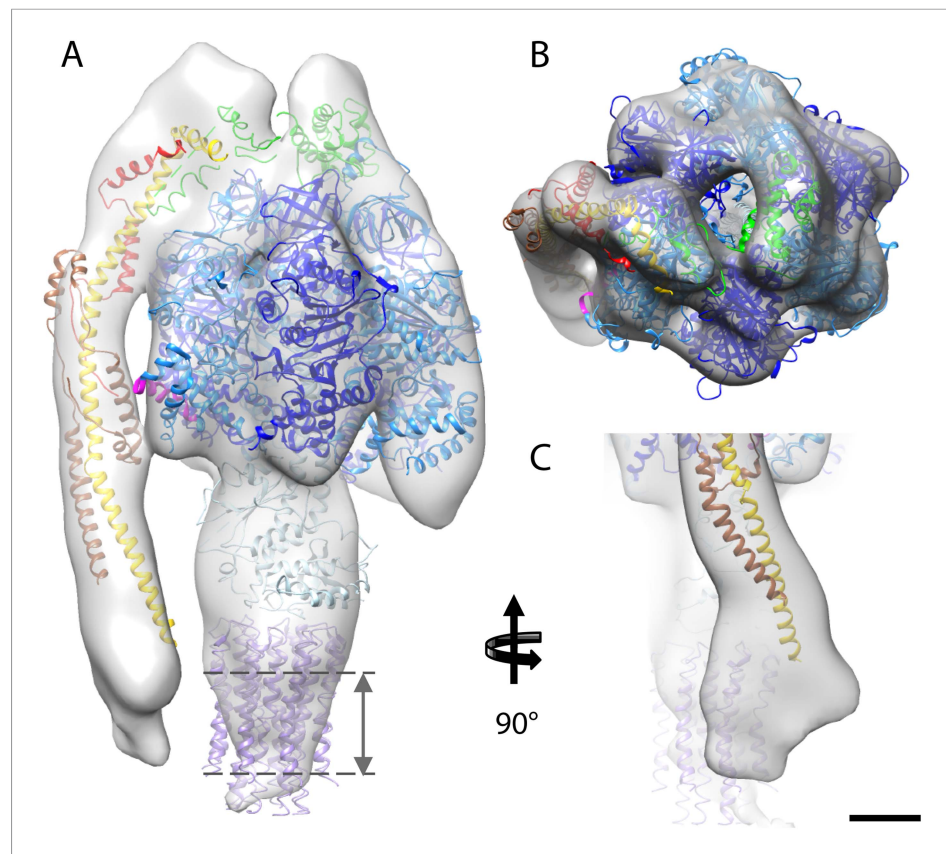

**Figure 4.** Fitted atomic model of the bovine  $F_1F_o$  ATP synthase. (A–C) Sub-tomogram average with fitted atomic models (A) side view, (B) top view, and (C) the peripheral stalk. Blue, catalytic domain; grey, central stalk; green, oligomycin sensitivity conferral protein (OSCP) from PDB:2WSS (Rees et al., 2009). Purple, c-ring (PDB:2XND) (Watt et al., 2010); Yellow-red, peripheral stalk fragment (PDB: 2CLY) (Dickson et al., 2006) with additional residues from PDB:2WSS (Rees et al., 2009). Pink,  $\alpha$ -subunit helix thought to interact with the peripheral stalk. Dashed lines, position of membrane. Scale bar, 20 Å.

DOI: [10.7554/eLife.06119.011](https://doi.org/10.7554/eLife.06119.011)

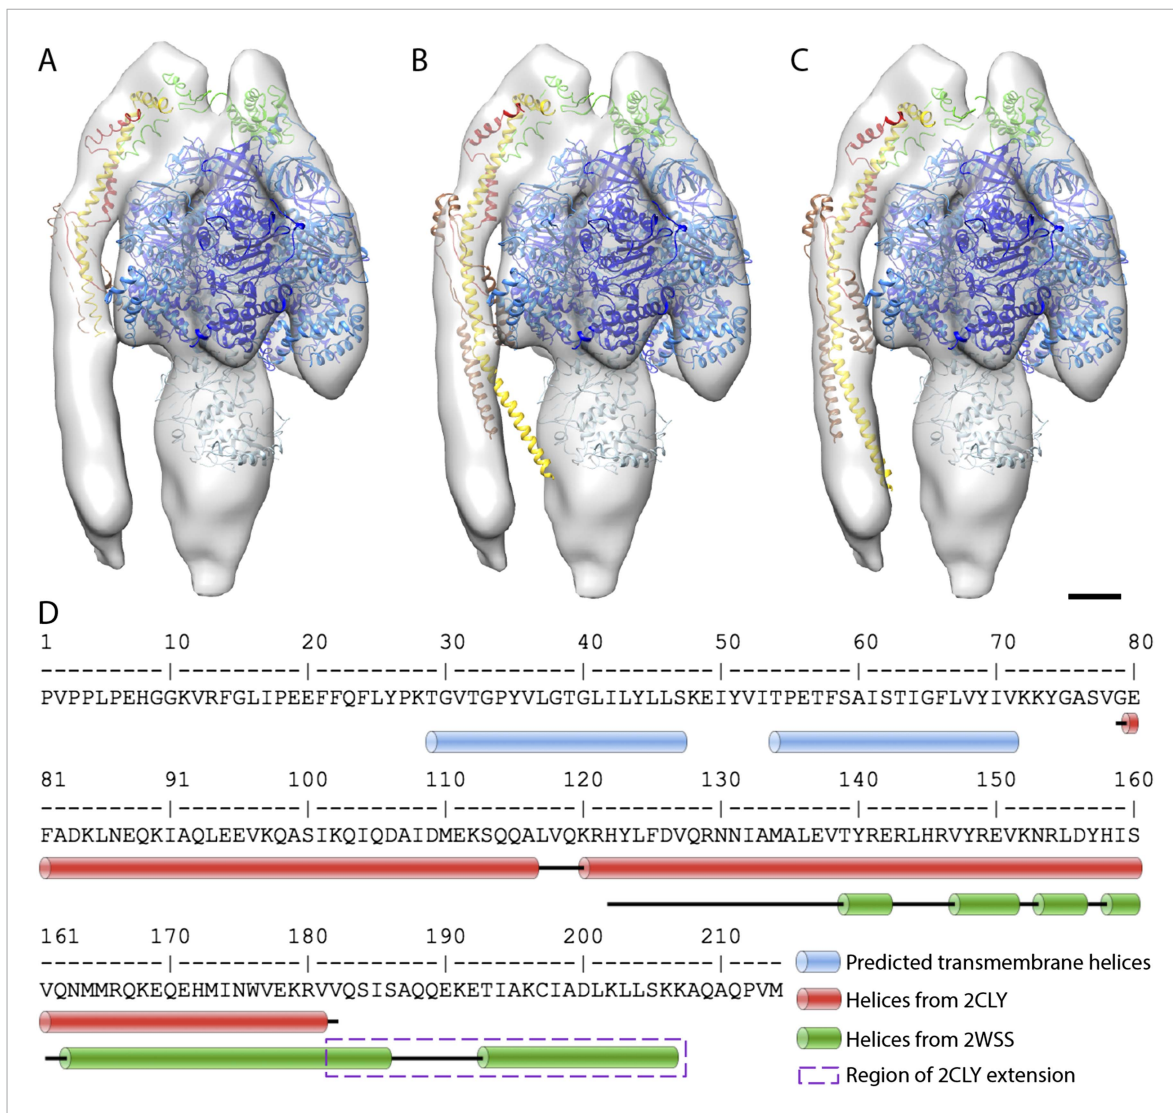

**Figure 4—figure supplement 1.** Possible atomic models fitted to sub-tomogram average. **(A)** Sub-tomogram average fitted with the F<sub>1</sub>/peripheral stalk complex (PDB entry: 2WSS). **(B)** as in **(A)** but peripheral stalk extended with the atomic model of the peripheral stalk fragment (PDB:2CLY). **(C)** as in **(B)** but the extended peripheral stalk sub-complex plus C-terminal domain of the OSCP subunit fitted to the average as a rigid-body subsequent to the fitting of the F<sub>1</sub>-subcomplex plus N-terminal domain of the OSCP subunit from 2WSS. **(D)** Sequence of the peripheral stalk subunit *b* from bovine heart showing the position of the predicted trans-membrane helices (blue) and the known helices (red and green) determined by x-ray crystallography. The dashed purple box indicates the residues from PDB:2WSS by which the PDB:2CLY structure was extended for rigid-body fitting in **(C)**. Atomic model subunit colors: blue,  $\alpha$ ; dark blue,  $\beta$ ; light blue,  $\gamma, \delta, \epsilon$ ; yellow, *b*; red, *F<sub>6</sub>*; brown, *d*; green OSCP. Scale bar: 20 Å.

DOI: 10.7554/eLife.06119.012

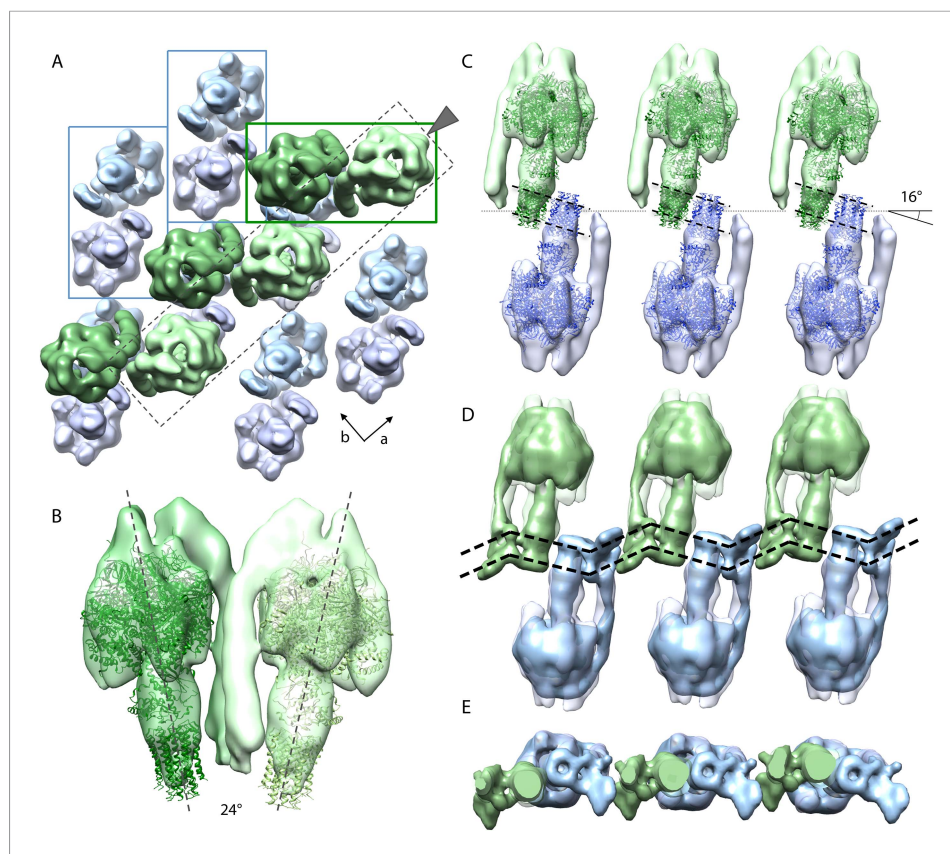

**Figure 5.** Packing of bovine  $F_1F_0$  ATP synthase in the 2D crystal. **(A)** Top view of the 2D crystal lattice of bovine  $F_1F_0$  ATP synthase. Rectangles indicate the position of ATP synthase pairs. Arrows indicate cell axes. **(B)** Side view of one pair. **(C)** Cross-section of the crystal lattice indicated by the dashed box and arrowhead in **(A)**.  $F_1F_0$  ATP synthases of opposite orientation in the membrane are connected via close interaction of their rotor-rings. The rotor-ring pairs are oriented  $16^\circ$  relative to the crystal plane (single grey dashed line). **(D)** Cross-section as in **(C)** but with the single-particle EM map (Baker et al., 2012) fitted into the subtomogram averages. The arrangement of the monomeric complexes on the 2D crystal lattice results in a locally kinked lipid bilayer (bold dashed lines). **(E)** Top view of the cross-section in **(D)** clipped to remove the catalytic domains of the upper  $F_1F_0$  ATP synthase layer.

DOI: [10.7554/eLife.06119.014](https://doi.org/10.7554/eLife.06119.014)

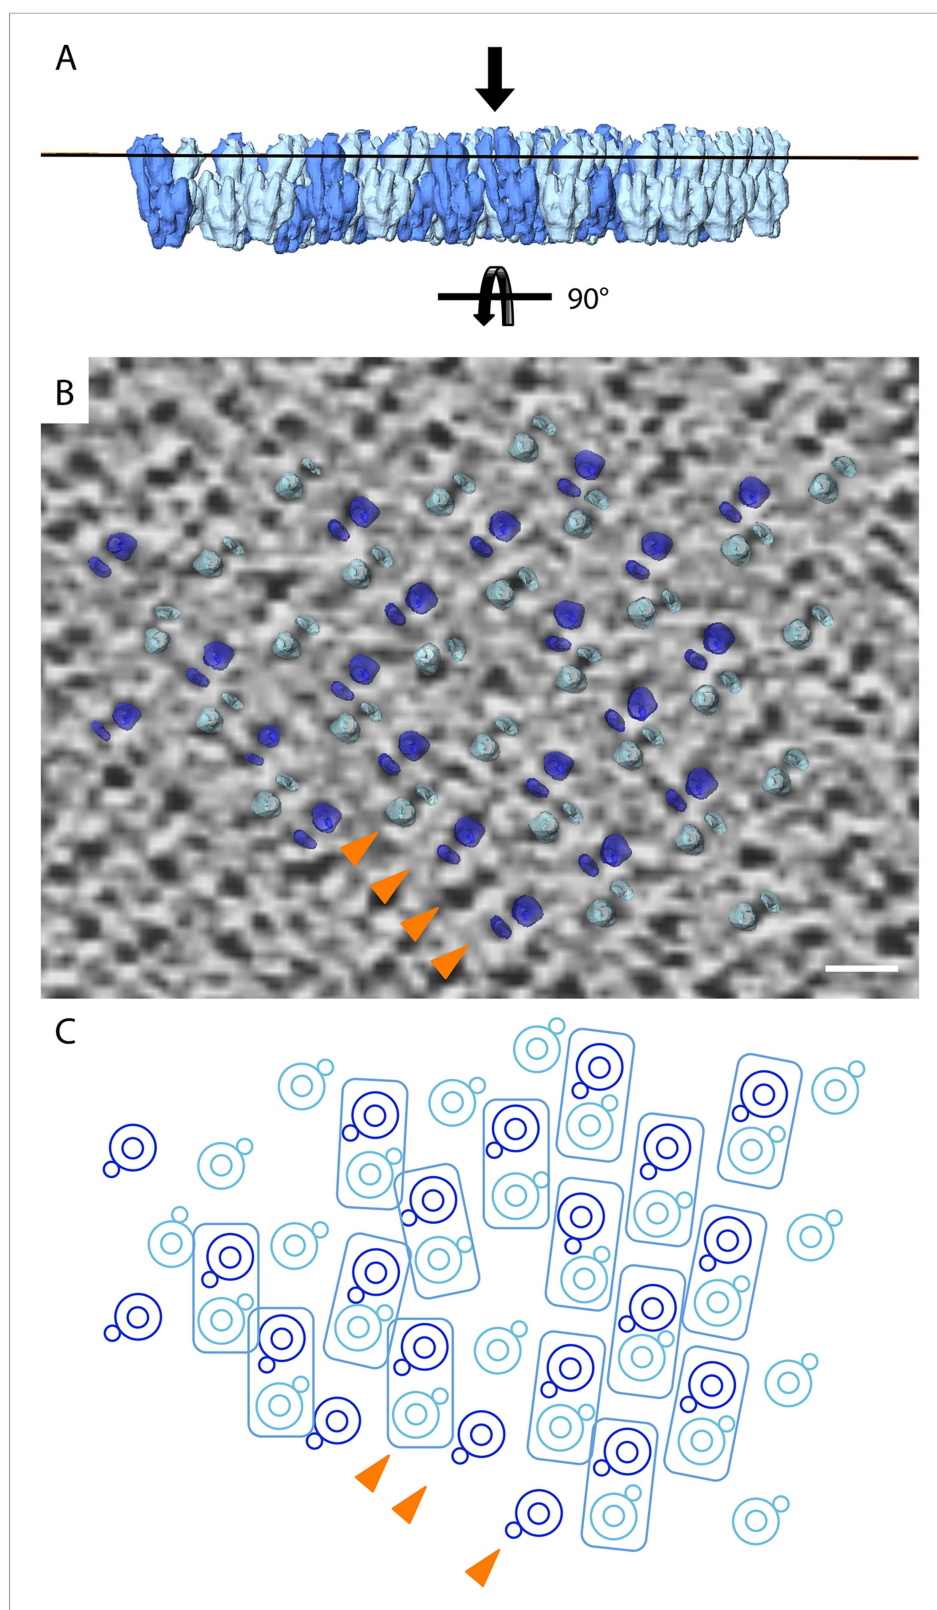

**Figure 5—figure supplement 1.** Lattice disorder. (A) Side view of subtomogram averages repositioned into the lower face of a 2D crystal. (B) Tomographic slice through a 2D crystal as indicated by line in (A) with a selection of repositioned sub-tomogram averages (transparent). The tomographic slice is viewed from the membrane (indicated Figure 5—figure supplement 1. continued on next page



Figure 5—figure supplement 1. Continued

by arrow in **A**). The repositioned subtomogram averages coincide with large and small circular densities, which correspond to the central and peripheral stalks, respectively (orange arrowheads). Scale bar: 10 nm. **(C)** Graphic representation of selected repositioned sub-tomogram averages in **(A)** highlighting the disorder in the crystal lattice. Small circles, peripheral stalk; double circle,  $F_1$ -subcomplex + c-ring; rectangles indicate  $F_1F_o$  ATP synthase pairs. Arrowheads correspond to those shown in **(B)** and are included for orientation purposes.

DOI: [10.7554/eLife.06119.015](https://doi.org/10.7554/eLife.06119.015)

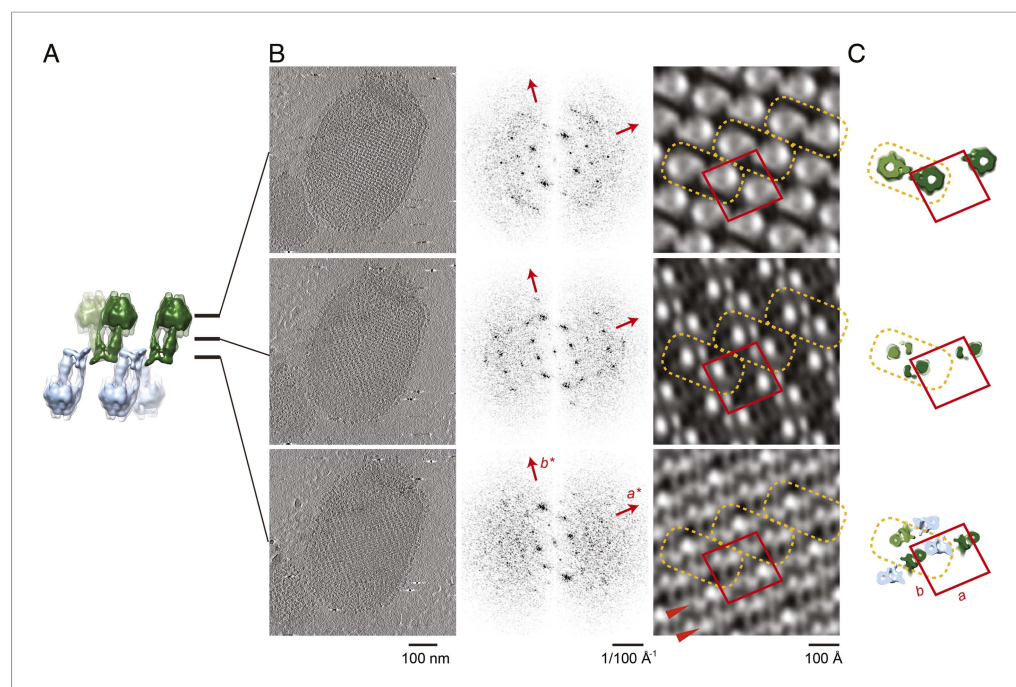

**Figure 6.** Projection maps of different z-slices in a 2D crystal of  $F_1F_o$  ATP synthases. **(A)** Side view of crystal packing from **Figure 4**. **(B)** Projection images (left) calculated from z-slices of the tomographic volume at z-height positions indicated by black bars in **(A)**, their Fourier transforms (centre) and projection maps (right). **(C)** z-slices through the crystal packing in **(A)** corresponding to the position of the projection maps shown in **(B)**. **(A–C)** Protein densities observed in the projection maps perfectly match the features shown in the corresponding z-slices of the crystal-packing model. Dashed orange outlines indicate a pair of  $F_1F_o$  ATP synthases, red boxes indicate the unit cell of the crystal with dimensions of  $a = 179.1 \text{ \AA}$ ,  $b = 171.4 \text{ \AA}$ ,  $\gamma = 94.9^\circ$ . Red arrowheads in the lower panel of **(B)** indicate lines of continuous protein density in the membrane plane.

DOI: [10.7554/eLife.06119.017](https://doi.org/10.7554/eLife.06119.017)



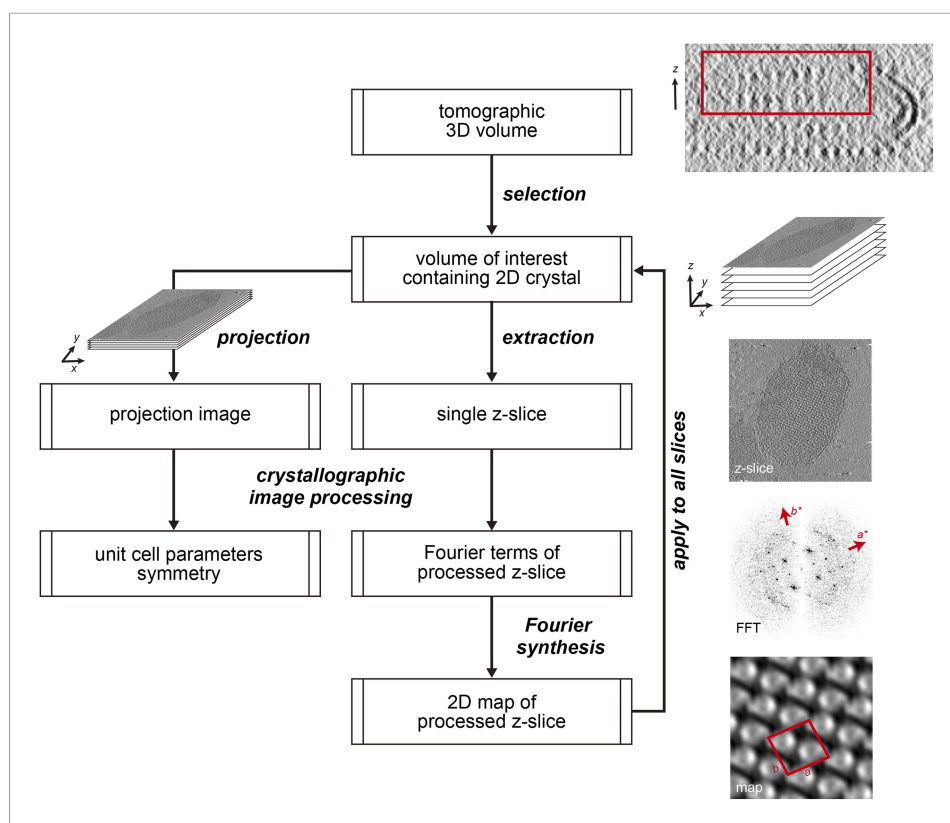

**Figure 6—figure supplement 1.** Flow chart of electron crystallographic image processing of a tomographic volume.

DOI: [10.7554/eLife.06119.018](https://doi.org/10.7554/eLife.06119.018)

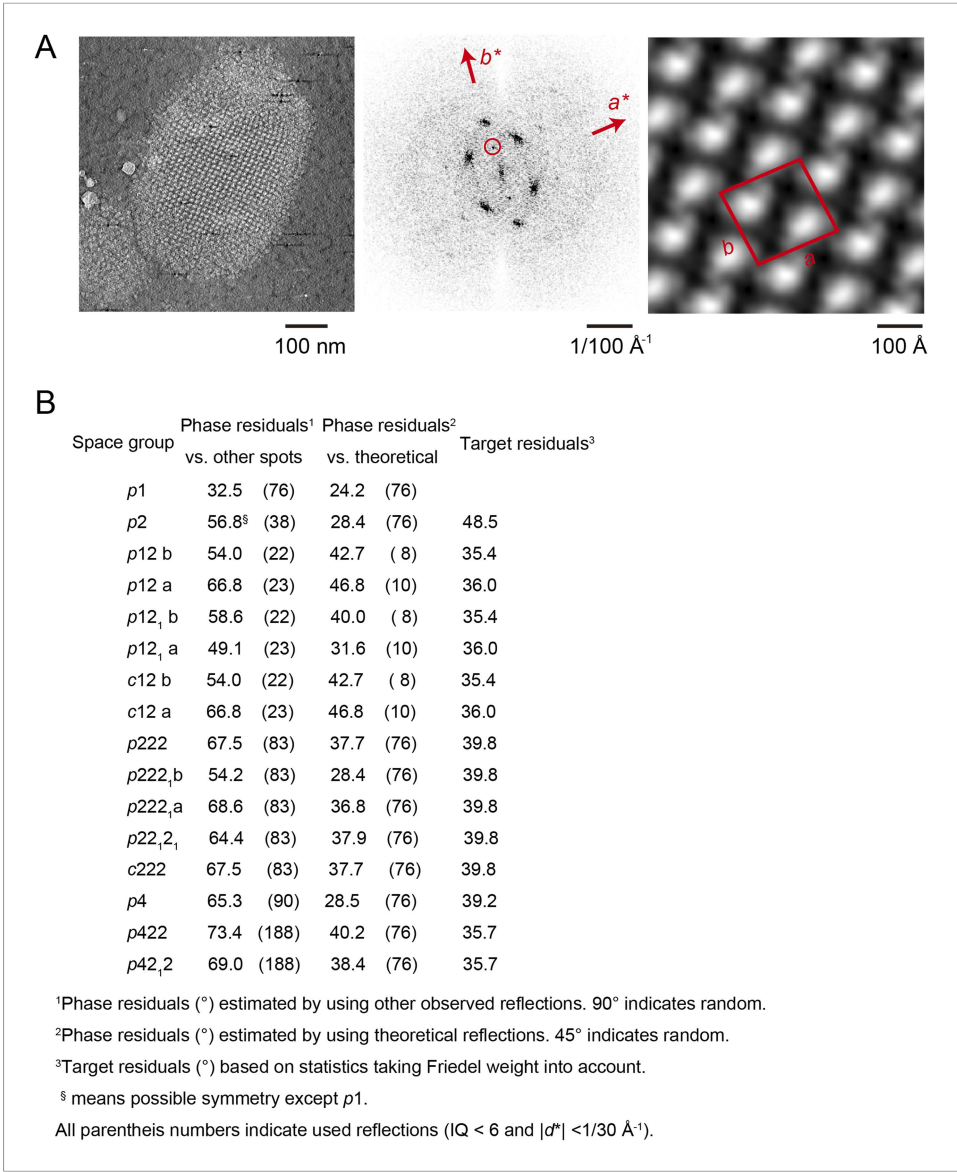

**Figure 6—figure supplement 2.** Unit cell parameters and crystal symmetry. **(A)** Projection images of tomographic z-slices containing the whole single-layered 2D crystal were processed to determine unit cell parameters and crystal symmetry. Image processing was performed using the MRC image processing programmes. **(A)** Projection image (left); Fourier transform (center); Fourier synthesis map (right). The red circle indicates the (0, 1) reflection. **(B)** The programme ALLSPACE did not indicate a clear plane-group symmetry for the 2D lattice.  
[DOI: 10.7554/eLife.06119.019](https://doi.org/10.7554/eLife.06119.019)

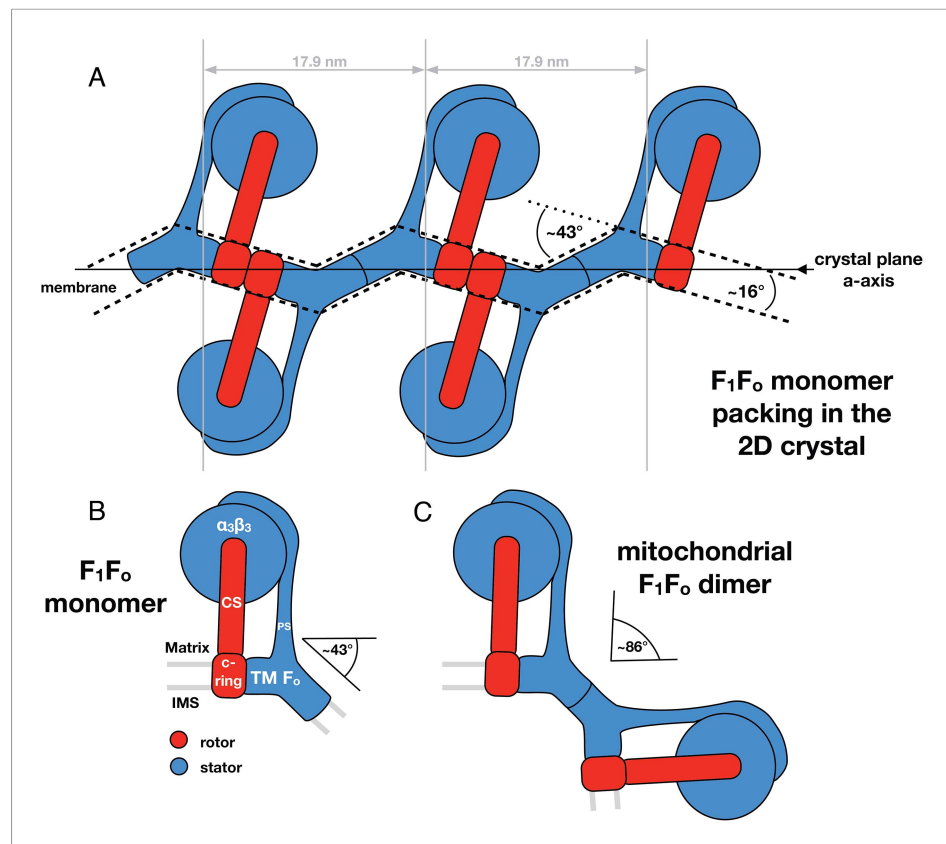

**Figure 7.** Monomeric mitochondrial F<sub>1</sub>F<sub>0</sub> ATP synthase as the factor determining cristae membrane curvature. **(A)** Schematic diagram of bovine F<sub>1</sub>F<sub>0</sub> ATP synthase in the 2D crystal lattice, with its transmembrane F<sub>0</sub> stator domain imposing a local 43° kink and a 16° inclination of the c-ring relative to the crystal plane. Blue, stator; red, rotor. **(B)** Schematic diagram of a single monomeric bovine F<sub>1</sub>F<sub>0</sub> ATP synthase. CS: central stalk; PS: peripheral stalk; IMS: intermembrane space; TM F<sub>0</sub>: transmembrane domain of F<sub>0</sub>. **(C)** Association of two monomeric F<sub>1</sub>F<sub>0</sub> complexes into a dimer results in an angle of 86°, as observed in ATP synthase dimers in mitochondrial cristae (Davies et al., 2012). DOI: [10.7554/eLife.06119.020](https://doi.org/10.7554/eLife.06119.020)
